# Supplementary material for: Total- and monomethyl-mercury and major ions in coastal California fog water: Results from two years of sampling on land and at sea
Source: Oxford University Press journal article supplement (doi:10.12952/journal.elementa.000101), 2016-01-01
Supplement: elementa_000101_s001.docx [file elementa_000101_s001.docx]

Table S-1: Mean concentrations, standard deviations, and number of valid and invalid field blank rinse water samples by site for the 2014 and 2015 campaigns. Blank was valid if [MMHg]blank / [MMHg]fog sample < 0.2. Meansample values were calculated based on the data in Table 2.

|  | HgT ng L-1 | | | | |  | MMHg ng L-1 | | | |
| --- | --- | --- | --- | --- | --- | --- | --- | --- | --- | --- |
| Site ID | mean |  | meanblank/ meansample | Nvalid | Ninvalid | mean |  | meanblank/ meansample | Nvalid | Ninvalid |
| HSU | 2.36 | 1.14 | 0.08 | 22 | 1 | 0.058 | 0.043 | 0.02 | 21 | 1 |
| PPW | 1.02 | 0.60 | 0.04 | 23 | 1 | 0.030 | 0.015 | 0.05 | 23 | 1 |
| BML | 5.90 | 5.74 | 0.18 | 2 | 9 | 0.394 | 0.365 | 0.18 | 4 | 15 |
| SFSU | 3.87 | 3.05 | 0.16 | 2 | 1 | 0.096 | 0.067 | 0.05 | 2 | 1 |
| MTA | 3.60 | 1.72 | 0.11 | 3 | 4 | 0.201 | 0.214 | 0.08 | 3 | 4 |
| UCSC | 1.32 | 0.81 | 0.05 | 32 | 2 | 0.075 | 0.092 | 0.04 | 32 | 2 |
| LML | 5.69 | 13.80 | 0.20 | 15 | 1 | 0.049 | 0.041 | 0.03 | 16 | 1 |
| FRF | 4.02 | 2.42 | 0.10 | 6 | 4 | 0.093 | 0.081 | 0.12 | 7 | 4 |
| OCE | -- | -- | -- | 0 | 0 | 0.025 | 0.049 | 0.23 | 15 | 1 |
