# Supplementary material for: Total- and monomethyl-mercury and major ions in coastal California fog water: Results from two years of sampling on land and at sea
Source: Oxford University Press journal article supplement (doi:10.12952/journal.elementa.000101), 2016-01-01
Supplement: elementa_000101_s002.docx [file elementa_000101_s002.docx]

Table S-2: Mann-Kendall time-trend analysis on MMHg concentrations in fog water by year for sites with at least 15 samples total. Statistically significant trends are shown in bold.

|  | All land sites | | HSU | | PPW | | UCSC | | LML | | FRF | |
| --- | --- | --- | --- | --- | --- | --- | --- | --- | --- | --- | --- | --- |
|  | 2014 | 2015 | 2014 | 2015 | 2014 | 2015 | 2014 | 2015 | 2014 | 2015 | 2014 | 2015 |
| Kendall correlation (t) | **-0.3** | -0.1 | **-0.6** | -1 | -0.2 | -0.1 | **-0.3** | -0.1 | -0.4 | 0.1 | **-0.7** | -0.5 |
| p-value | **0.0002** | 0.1 | **0.0005** | 0.3 | 0.3 | 0.7 | **0.008** | 0.8 | 0.5 | 0.9 | **0.009** | 0.06 |
