# Supplementary material for: Total- and monomethyl-mercury and major ions in coastal California fog water: Results from two years of sampling on land and at sea
Source: Oxford University Press journal article supplement (doi:10.12952/journal.elementa.000101), 2016-01-01

Figure S-2: The standard fog collector with the Chilean Raschel mesh and the Spectrum® tipping bucket rain gauge and data logger.


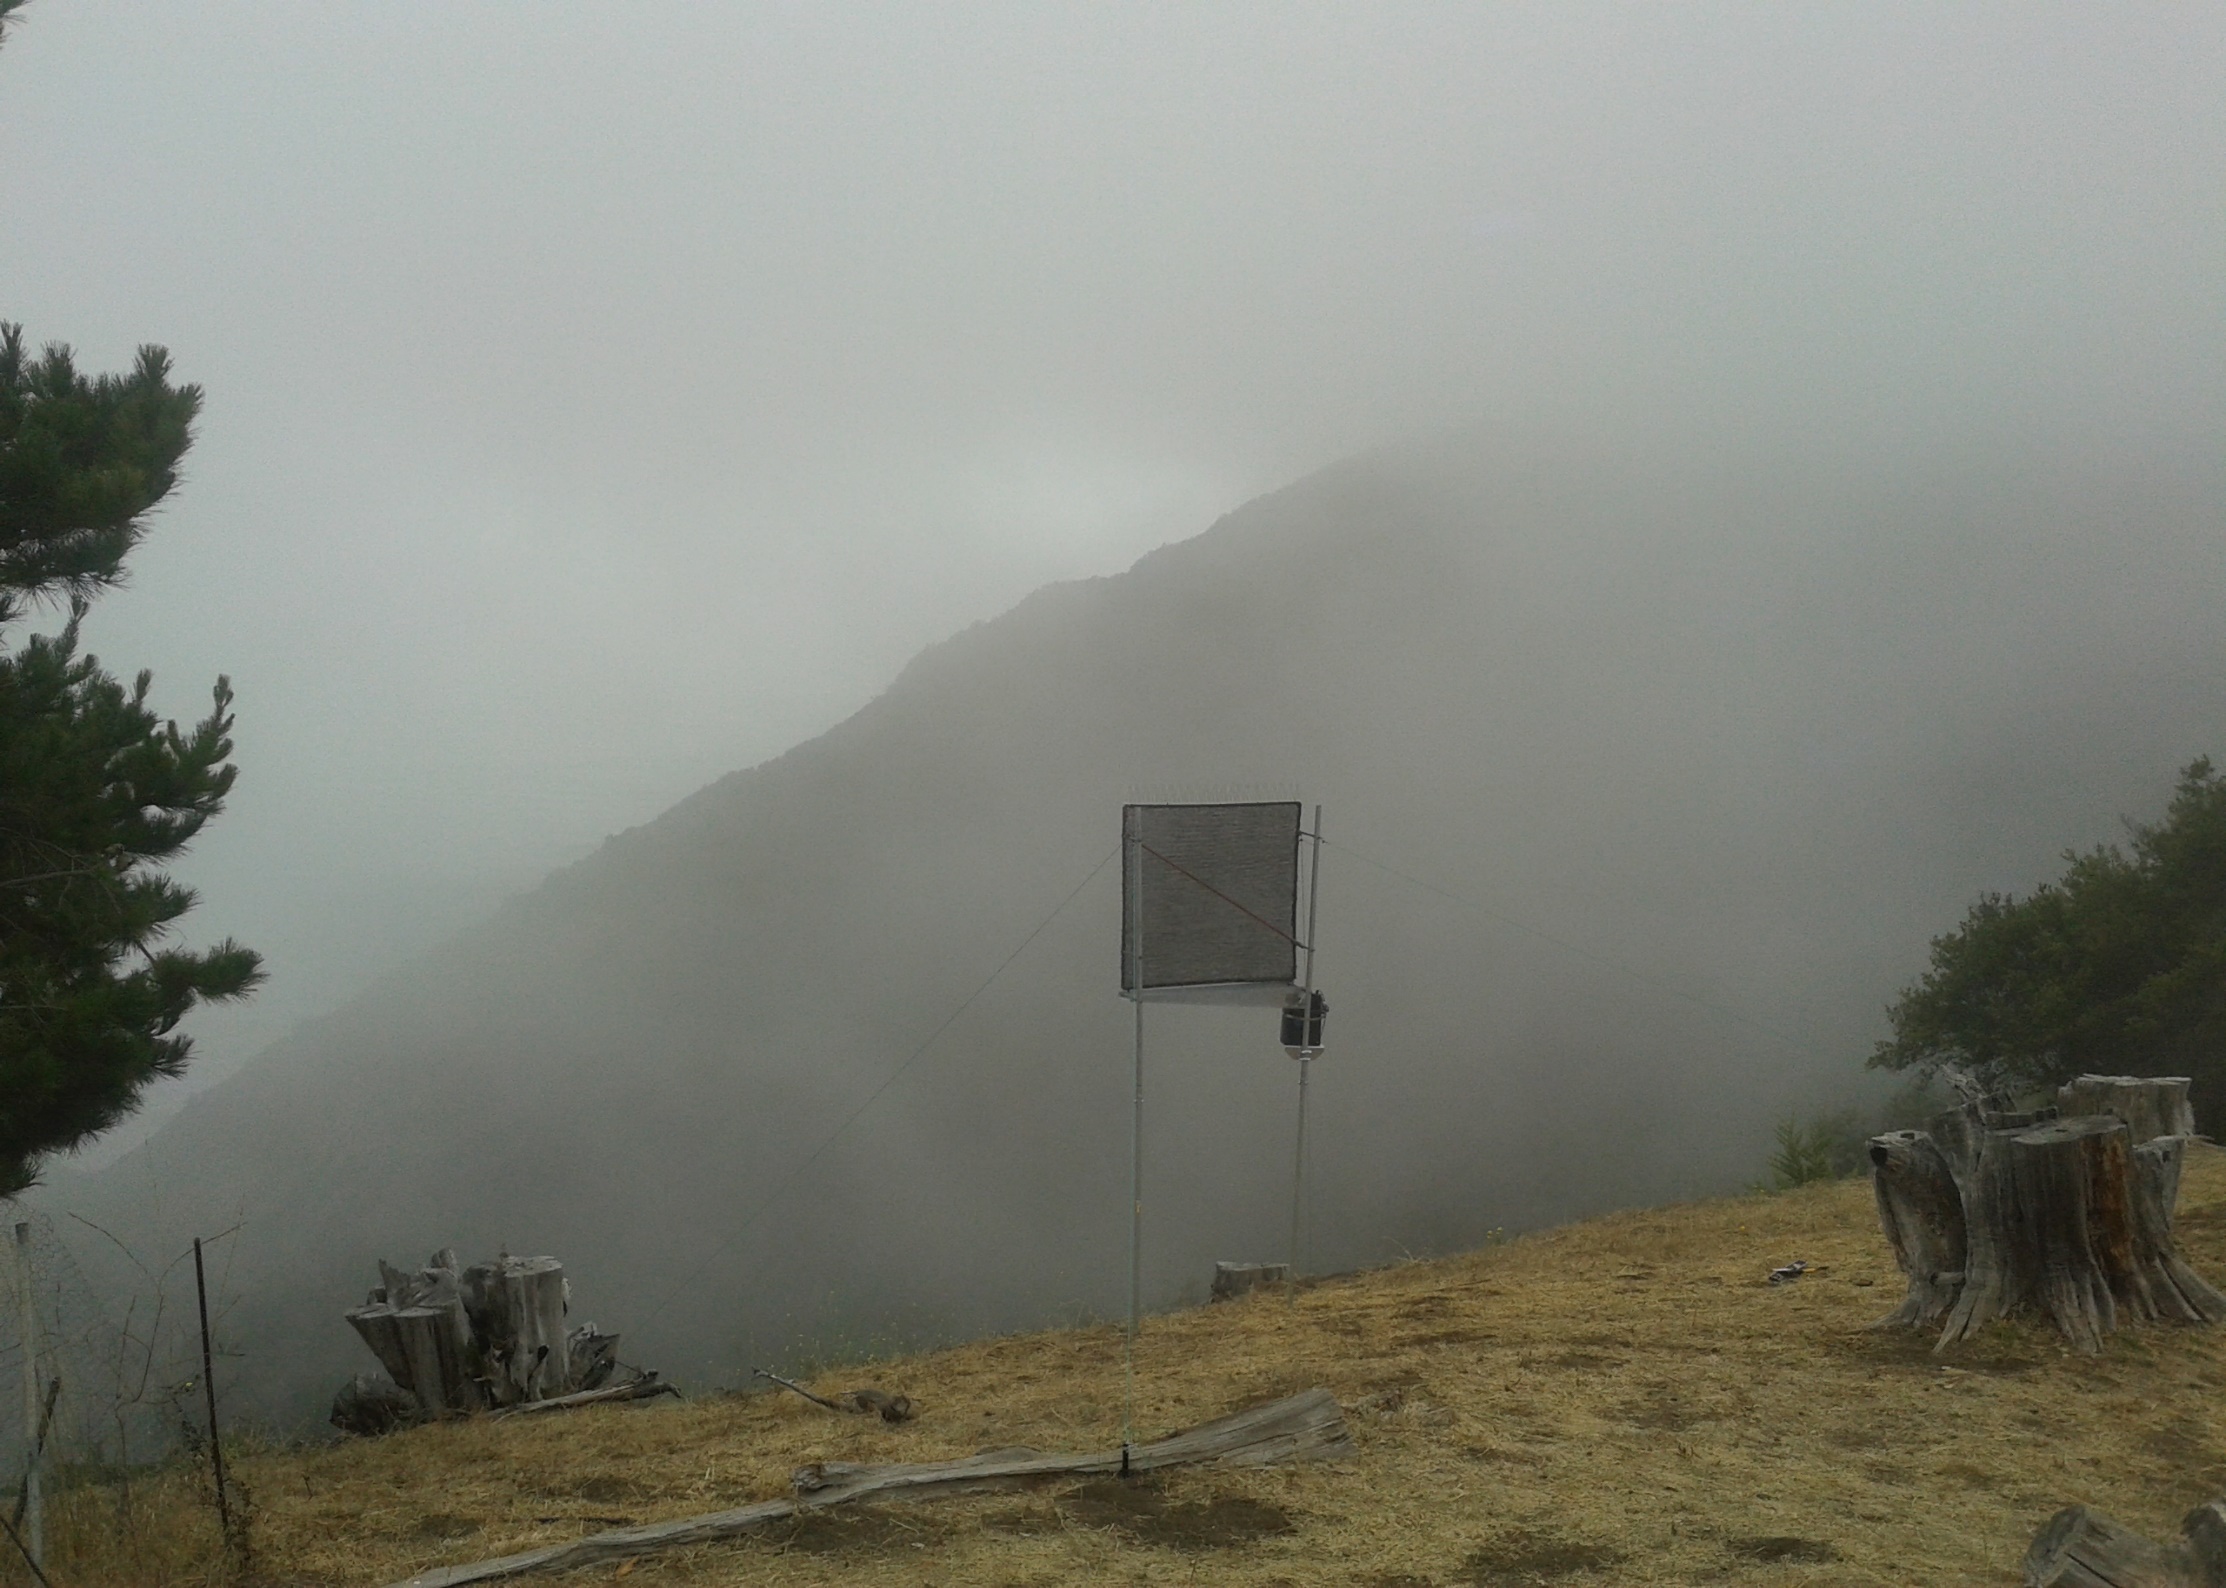

Supplement: elementa_000101_s005.docx [file elementa_000101_s005.docx]
