# Supplementary material for: Total- and monomethyl-mercury and major ions in coastal California fog water: Results from two years of sampling on land and at sea
Source: Oxford University Press journal article supplement (doi:10.12952/journal.elementa.000101), 2016-01-01

Figure S-3: Shipboard fog water sampling on the R/V Pt. Sur. The collector has front and back doors hanging down and is at a height of 11 m.


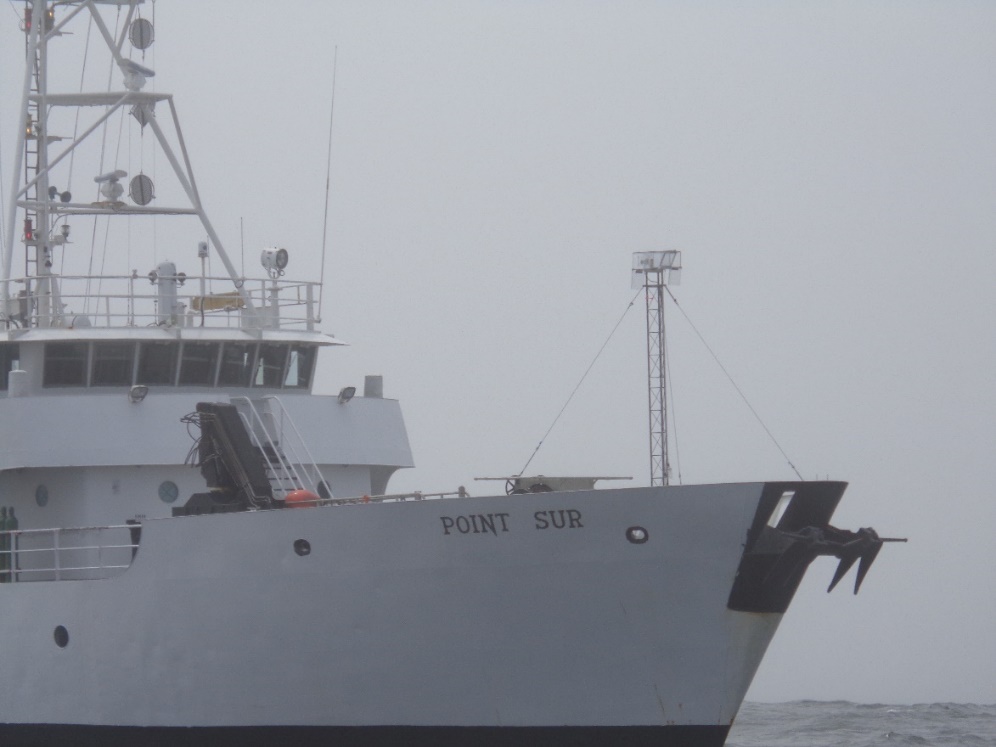

Supplement: elementa_000101_s006.docx [file elementa_000101_s006.docx]
