# Supplementary material for: Total- and monomethyl-mercury and major ions in coastal California fog water: Results from two years of sampling on land and at sea
Source: Oxford University Press journal article supplement (doi:10.12952/journal.elementa.000101), 2016-01-01

Figure S-4: Fog water sampling on the R/V *Robert Gordon Sproul*. This location made it easier to access and clean the CASCC, but was not as isolated from the ship’s exhaust.


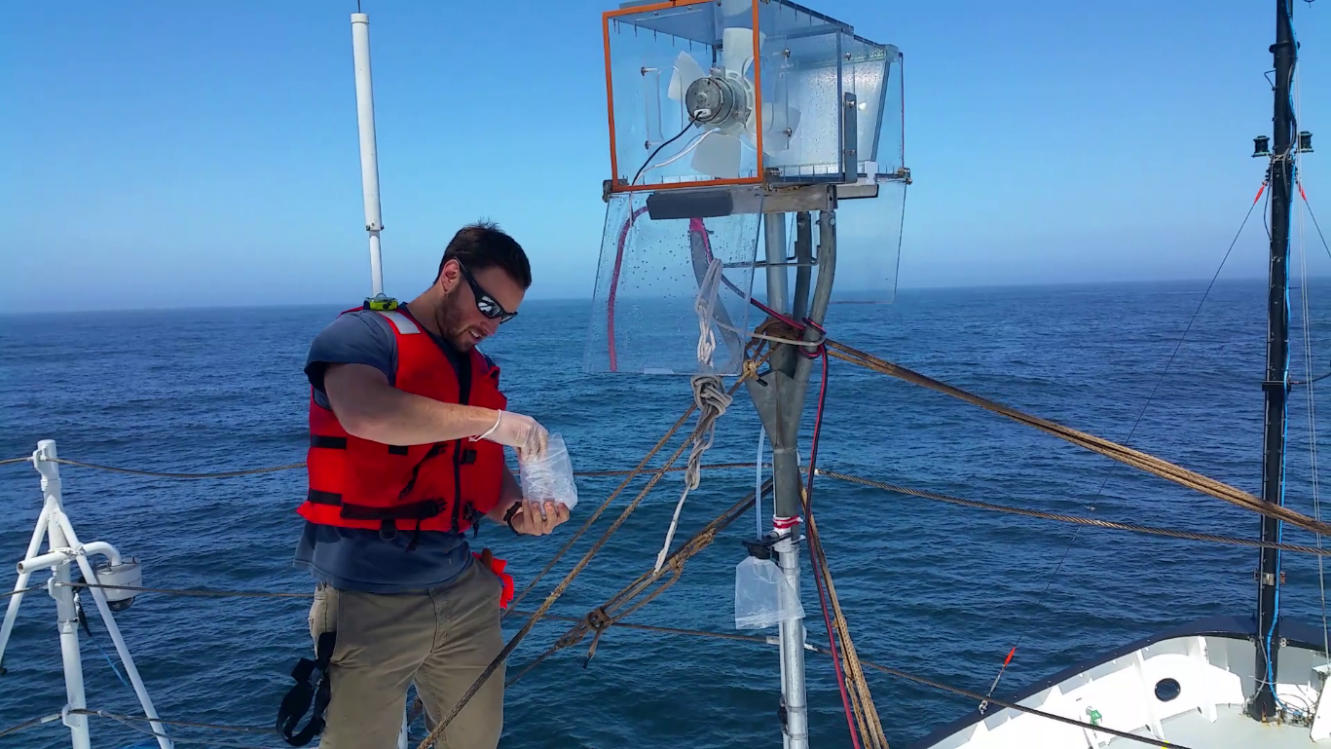

Supplement: elementa_000101_s007.docx [file elementa_000101_s007.docx]
