# Supplementary material for: Total- and monomethyl-mercury and major ions in coastal California fog water: Results from two years of sampling on land and at sea
Source: Oxford University Press journal article supplement (doi:10.12952/journal.elementa.000101), 2016-01-01
Supplement: elementa_000101_s008.docx [file elementa_000101_s008.docx]

Figure S-5: Two-laboratory (UCSC and MLML) intercomparison of MMHg concentrations in fog water collected at HSU on the dates shown.
