# Supplementary material for: Total- and monomethyl-mercury and major ions in coastal California fog water: Results from two years of sampling on land and at sea
Source: Oxford University Press journal article supplement (doi:10.12952/journal.elementa.000101), 2016-01-01
Supplement: elementa_000101_s010.docx [file elementa_000101_s010.docx]

Figure S-7: Laboratory intercomparison (UCSC and Harvey Mudd (HM)) of SO42- and NO3- concentrations in fog and field blank water collected at the UCSC site.
