# Supplementary material for: Total- and monomethyl-mercury and major ions in coastal California fog water: Results from two years of sampling on land and at sea
Source: Oxford University Press journal article supplement (doi:10.12952/journal.elementa.000101), 2016-01-01

Figure S-8: HgT (open symbols) and MMHg (closed symbols) in field blank rinse water samples from all collection sites in 2014-2015, all samples.


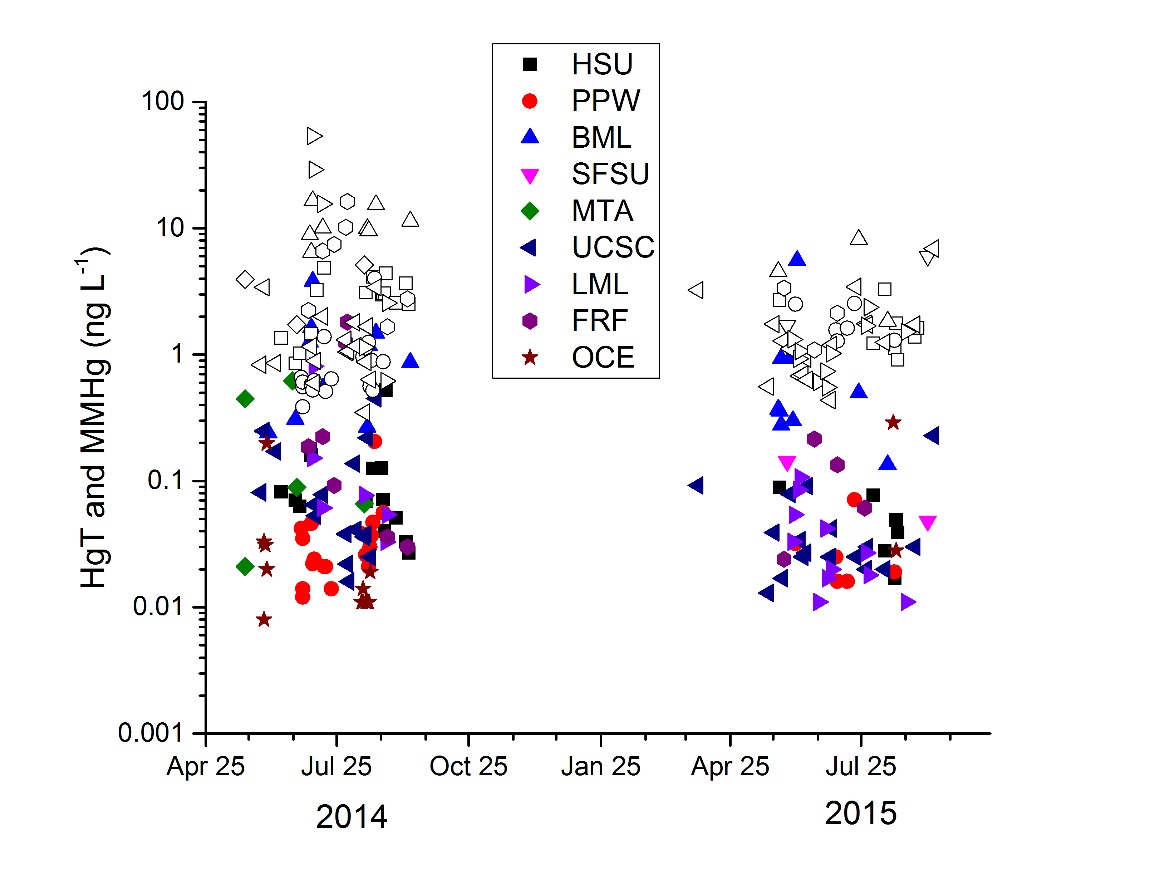

Supplement: elementa_000101_s011.docx [file elementa_000101_s011.docx]
