# Supplementary figures and images for: Total- and monomethyl-mercury and major ions in coastal California fog water: Results from two years of sampling on land and at sea
Source: Oxford University Press journal article supplement (doi:10.12952/journal.elementa.000101), 2016-01-01

Figure S-1: The UCSC built CASCC.


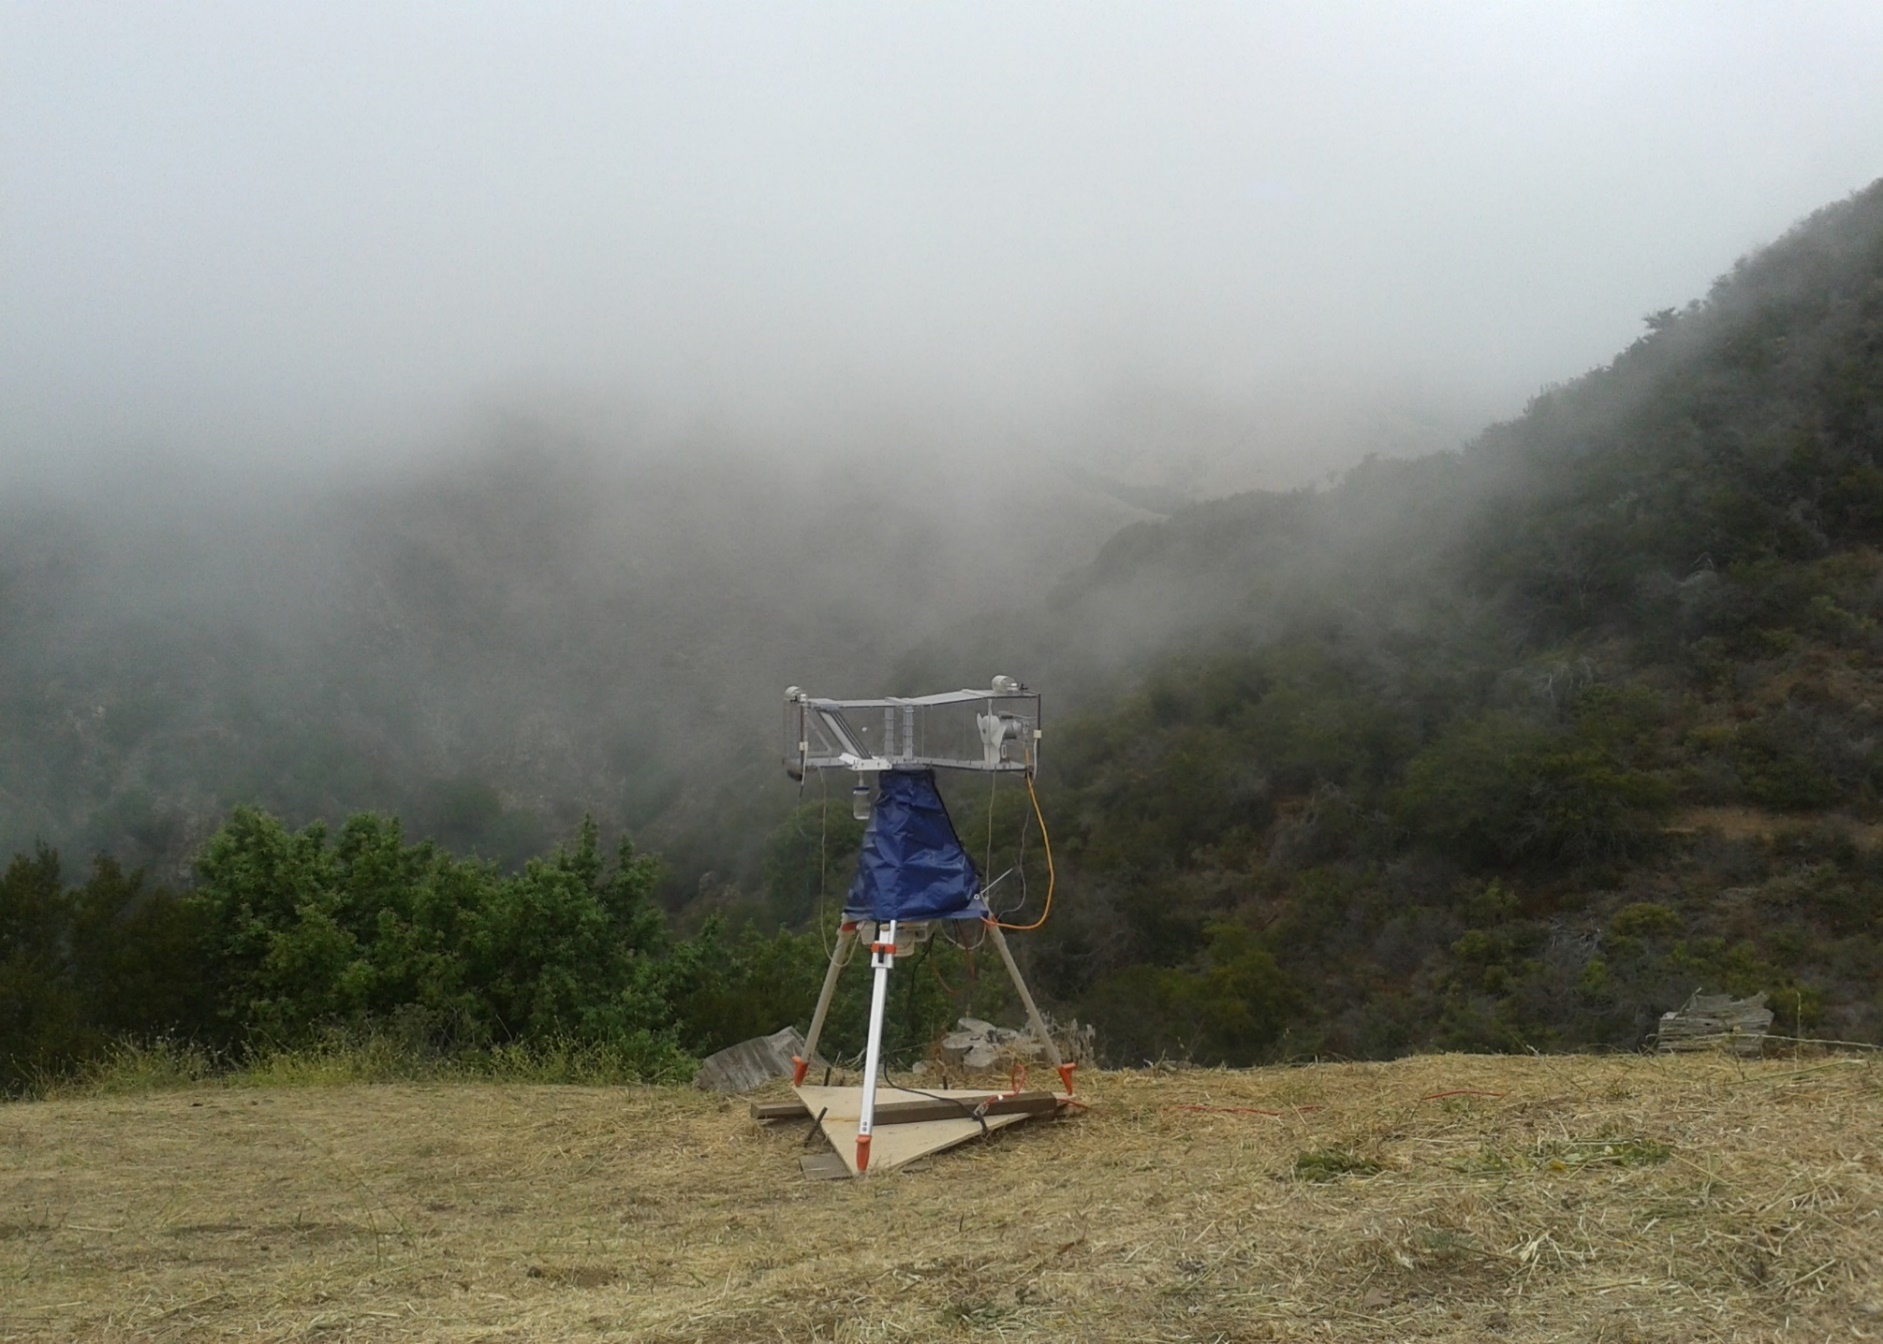

Supplement: elementa_000101_s004.docx [file elementa_000101_s004.docx]
